# Supplementary material
Source: HighWire-hosted journal article supplement (https://bmjopen.bmj.com/content/13/6/e066669)
Supplement: inline-supplementary-material-1 [file inline-supplementary-material-1.pdf]

## Consentimiento informado – Información al paciente

Título del protocolo: **Efectividad de una intervención digital basada en modificación de estilos de vida en prevención secundaria: iGAME ensayo clínico aleatorizado controlado**

Investigadores principales: Dr. Antonio I. Cuesta Vargas y Dr. Fermín Mayoral Cleries

Sede donde se recoge los datos del estudio:

Facultad de Ciencias de la Salud,

Universidad de Málaga

Arquitecto Francisco Peñalosa, 3, 29071 Málaga

Nombre y edad del paciente:

*Antes de proceder a la firma de este consentimiento informado, lea atentamente la información que a continuación se le facilita y realice las preguntas que considere oportunas. Una vez comprendido todos los apartados del estudio, y si desea participar, se le pedirá que firme el presente consentimiento, del cual, se le entregará una copia firmada y fechada.*

## Justificación del estudio

Usted ha sido invitado a participar en un estudio de investigación. En este documento se le explicará por qué va a realizar el estudio y que implicará. Por favor, antes de tomar una decisión es importante que entienda todo y lea este documento de forma cuidadosa.

El presente estudio está organizado por los Grupos de Investigación Clinimetría en Fisioterapia y Salud Mental, grupos perteneciente al Instituto de Investigación Biomédica de Málaga (IBIMA). La presente investigación forma parte de un proyecto financiado por la Comisión Europea a través del programa Horizon 2020.

Objetivos del estudio:

- Estudiar la efectividad sobre la conducta sedentaria de un programa de intervención basado en la utilización de las nuevas tecnologías de gamificación y los juegos formativos.

Importancia:

- Aunque existen numerosas estrategias de intervención sobre la conducta sedentaria, en un alto porcentaje de éstas no se ha comprobado la efectividad de las herramientas utilizadas.

Los resultados de esta investigación serán más fiables y mejores si todas las personas a las que invitamos a participar deciden tomar parte en el estudio y por ello esperamos que usted lo haga.

De usted depende decidir si quiere formar parte del estudio o no. Este estudio no sería capaz de hacerse sin la participación voluntaria de los entrevistados. Como no puede ser de otra manera, usted es libre de retirarse en cualquier momento sin necesidad de dar ninguna razón.

### Implicaciones para el paciente

- La participación es totalmente voluntaria.
- El participante puede retirarse del estudio cuando así lo manifieste, sin ser su decisión cuestionada y sin que esto repercuta en sus cuidados médicos.
- Todos los datos carácter personal, obtenidos en este estudio son confidenciales y se tratarán conforme a la Ley Orgánica 3/2018, de 5 de diciembre, de Protección de Datos y Garantía de los Derechos Digitales.
- La información obtenida se utilizará exclusivamente para los fines específicos de este estudio.

### Criterios de selección

Usted fue seleccionado principalmente por tener entre 18 y 65 años, tener una conducta sedentaria reconocida y mantener una intención de cambio de esta conducta.

### Procedimiento de recogida de datos y programa de intervención

Si decide aceptar participar en el estudio, se le realizarán algunas preguntas sobre usted, sus hábitos y sus antecedentes médicos. Se realizarán en la primera sesión evaluaciones a través de cuestionarios. Estos cuestionarios se volverán a cumplimentar a las 6, 12, 27 y 52 semanas.

Una vez realizada la evaluación inicial, se iniciará una intervención de 12 semanas. En el caso de ser asignado al grupo intervención, su participación estará basada en el uso de una aplicación móvil orientada en la modificación de la conducta sedentaria. En el caso de ser asignado al grupo control, recibirá pautas generales acerca del sedentarismo y la actividad física.

### Contraindicaciones

Las contraindicaciones aquí descritas han sido consideradas previamente a la realización del presente estudio para incluirle a usted dentro del mismo, pero le informamos de las mismas por si se hubiera presentado alguna de ellas y usted no nos lo hubiese comunicado anteriormente:

- Enfermedades psiquiátricas graves.
- Deterioro cognitivo severo.
- Incapacidad psíquica para comprender los test.
- Patologías sistémicas agudas.
- Tumor.
- Infarto de miocardio reciente.
- Enfermedades infecciosas.
- Embarazo.

*Al firmar este documento, usted desvincula de toda responsabilidad a todos los investigadores de este estudio, además de afirmar que se encuentra en perfectas condiciones para la ejecución de todos los ejercicios propuestos. Usted antes de comenzar el estudio e incluso antes de firmar el presente documento, puede formular cuantas preguntas estime oportunas.*

### Aclaraciones

- Su decisión de participar en el estudio es completamente voluntaria.
- No habrá ninguna consecuencia desfavorable para usted, en caso de no aceptar la invitación.
- Si decide participar en el estudio puede retirarse en el momento que lo desee, aun cuando el investigador responsable no se lo solicite, informando las razones de su decisión la cual será respetada en su integridad.
- No tendrá que hacer gasto alguno durante el estudio.
- No recibirá pago por su participación.
- En el transcurso del estudio usted podrá solicitar información actualizada sobre el mismo, al investigador responsable.
- Todos los datos y resultados obtenidos y emanados del presente estudio estarán destinados sólo y exclusivamente a la presente investigación.
- La información obtenida en este estudio, utilizada para la identificación de cada paciente, será mantenida con estricta confidencialidad por el grupo de investigadores.
- Si considera que no hay dudas ni preguntas acerca de su participación, puede, si así lo desea, firmar la Carta de Consentimiento Informado anexa a este documento.

Sus datos serán tratados de acuerdo a la Ley Orgánica 3/2018, de 5 de diciembre, de Protección de Datos y Garantía de los Derechos Digitales.

## Declaración del consentimiento informado

Yo,

he leído y comprendido la información previamente descrita y mis preguntas han sido respondidas. He sido informado y entiendo que los datos e imágenes obtenidas en el estudio pueden ser publicados o difundidos con fines científicos, manteniendo mi anonimato en todo momento. Por ello, acepto participar en el presente estudio de investigación.

Recibiré una copia firmada y fechada del presente consentimiento.

Firma del participante:

Fecha:

Nombre y firma del testigo (sólo si corresponde):

Fecha:

D. Antonio I. Cuesta Vargas, como investigador principal de este estudio, o alguno de sus colaboradores, declara que:

Yo, \_\_\_\_\_, con cargo de \_\_\_\_\_ en el presente estudio, he explicado al Sr(a) arriba firmante, la naturaleza y los propósitos de la investigación, así como le he expuesto los riesgos y beneficios que implica la participación. He respondido las preguntas del paciente y he solicitado si tiene alguna duda. Acepto que he leído y conozco la normativa correspondiente para realizar investigación con seres humanos y me acojo a ella.

Una vez concluidas y aclaradas todas las dudas y consultas, se procede a firmar el presente documento:

Fecha:

Firma del investigador:

## Carta de revocación del consentimiento

Título del protocolo: **Efectividad de una intervención digital basada en modificación de estilos de vida en prevención secundaria: iGAME ensayo clínico aleatorizado controlado.**

Investigadores principales: Antonio I. Cuesta  
Vargas y Fermín Mayoral Cleries

Sede donde se recoge los datos del estudio: Hospital Civil  
Pza. Hospital Civil s/n 29009 Málaga

Nombre y edad del paciente:

Por este conducto deseo informar mi decisión de retirarme de este protocolo de investigación por las siguientes razones:

  
  
  
  

Firma del participante:

Fecha:

Nombre y firma del testigo (sólo si corresponde):

Fecha:
