# Supplementary material
Source: HighWire-hosted journal article supplement (https://bmjopen.bmj.com/content/13/6/e066669)
Supplement: inline-supplementary-material-2 [file inline-supplementary-material-2.pdf]

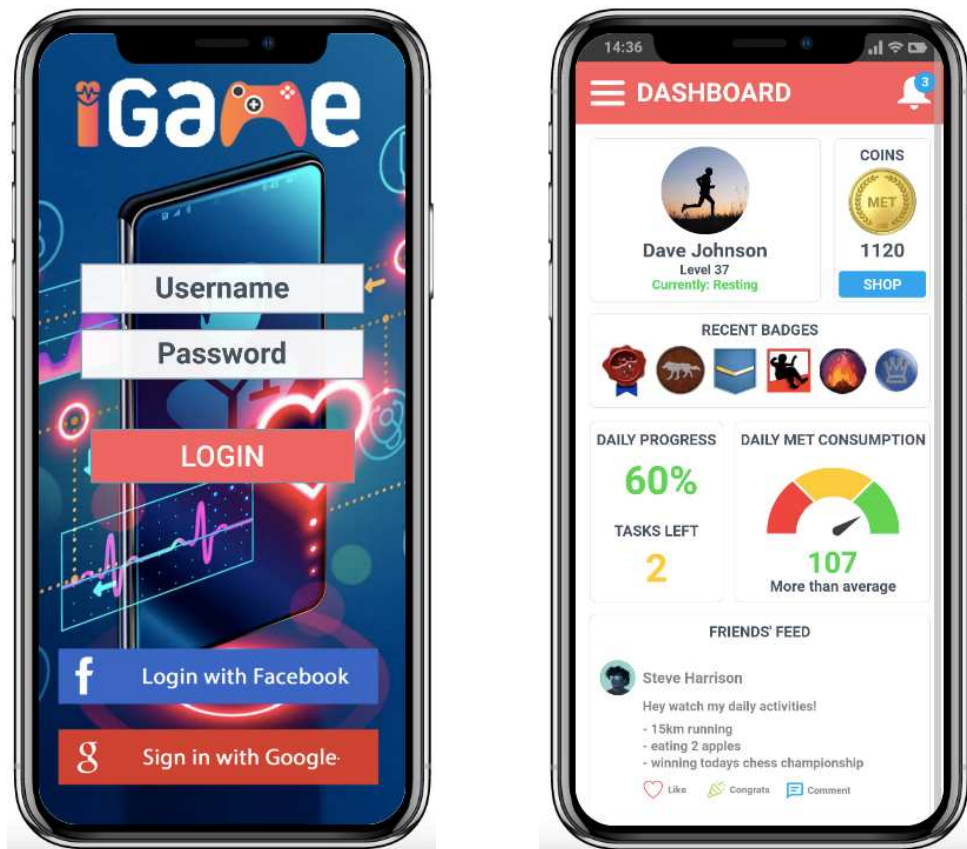

Supplementary file 2. Screenshots of first application prototype, not final version. All rights of the screenshot and the application belong to their respective owners: the iGame project consortium.
